RESEARCH ARTICLE

# Normative Database of Retinal Oximetry in Asian Indian Eyes

Ashwin Mohan, Supriya Dabir\*, Naresh Kumar Yadav, Matthew Kummelil, Rajesh S. Kumar, Rohit Shetty

Narayana Nethralaya, Post Graduate Institute of Ophthalmology, Bangalore, India

\* [supriad@gmail.com](mailto:supriad@gmail.com)

## Abstract

### Objective

To study the oxygen saturation profile in normal Asian Indian eyes.

### Design

A cross sectional prospective study.

### Subjects

Ninety eight consecutive patients presenting to our hospital with best corrected distance visual acuity (BCVA) of 20/20 and a normal ophthalmic examination were included in the study. Patients having any ocular or systemic disease were excluded from the study.

### Materials and Methods

Oximetry was performed on all subjects with the Oxymap T1 retinal oximeter (Oxymap hf, Reykjavik, Iceland).

### Main Outcome Measures

The images were analysed for oxygen saturation and diameter.

### Results

The mean age was 33 years (Range: 18-63; SD: 12.4). The average arteriolar saturation was  $90.3 \pm 6.6\%$  and the venous saturation was  $56.9\% \pm 6.3$ . The average A-V (arterio-venous) difference was  $33.2\% \pm 5.2$ . There was an increase in arteriolar ( $R^2 = 0.264$ ;  $p=0.001$ ) and venous saturation ( $R^2 = 0.151$ ;  $p=0.001$ ) with age. There was no significant change in the arterio-venous saturation difference (AVSD). The inferotemporal quadrant had the lowest saturations. Age correlated positively with ocular perfusion pressure (OPP) ( $R^2 = 0.07$ ;  $p=0.007$ ). OPP correlated positively with global arteriolar saturation ( $R^2=0.057$ ,  $p=0.018$ ).

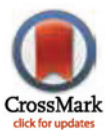

## OPEN ACCESS

**Citation:** Mohan A, Dabir S, Yadav NK, Kummelil M, Kumar RS, Shetty R (2015) Normative Database of Retinal Oximetry in Asian Indian Eyes. PLoS ONE 10(4): e0126179. doi:10.1371/journal.pone.0126179

**Academic Editor:** Bang V Bui, University of Melbourne, AUSTRALIA

**Received:** September 30, 2014

**Accepted:** March 30, 2015

**Published:** April 29, 2015

**Copyright:** © 2015 Mohan et al. This is an open access article distributed under the terms of the [Creative Commons Attribution License](https://creativecommons.org/licenses/by/4.0/), which permits unrestricted use, distribution, and reproduction in any medium, provided the original author and source are credited.

**Data Availability Statement:** All relevant data are within the paper.

**Funding:** The authors received no specific funding for this work.

**Competing Interests:** The authors have declared that no competing interests exist.

## Conclusion

This study provides the normative database for an Indian population and is comparable to previous studies. Age, vessel diameter and OPP were the significant factors that influenced the saturation. Arteriolar and venous saturations increased with age while the AVSD did not change significantly.

## Introduction

Oxygen is important for the normal physiology and metabolism in the body. The retina has the highest metabolic demands of any tissue in the body with the photoreceptors having the highest demand in the retina.[1] Inadequate delivery of oxygen or altered utilization of oxygen can either trigger disease or be a marker for underlying disease activity respectively.[2–5]

Hemoglobin bound to oxygen has differential absorption of light at different wavelengths. This is the basic principle used in dual wavelength oximetry. Fundus photographs at 2 different wavelengths are taken and the relative oxygen concentration can be determined using photo-spectrometry. [6,7] Jani et al[8] in their work state that this machine is based on a similar principle as the finger pulse oximeter.

Previous studies[8,9] have established a normative database using the Oxymap T1 Retinal Oxymeter (Oxymap, Reykjavik, Iceland). We have used the same equipment in our study. Jani et al[8] showed in their multiethnic study that race and pigmentation when uniform do not play a role. We wanted to evaluate this in an Indian population.

It has been shown that narrower retinal vessels show higher oxygen saturations[9]. In contrast, in another study[8] the diameter had no impact on the measured saturation as the software compensated for the optical artifacts caused by the diameter. In view of the conflicting results, we intend to establish our own results.

We aim to study averages and variability of oxygen saturation in healthy individuals in an Indian population. We also aim to study the interocular variability, quadrant values, relationship with diameter and age.

## Methods

Healthy subjects presenting to our outpatient department at Narayana Nethralaya, Bangalore were enrolled in the study with their consent. The study follows the tenets of Helsinki. The Institutional Review Board and Ethics Committee approved the study.

## Inclusion

Enrolled subjects had a normal ophthalmic examination, BCVA 20/20–20/30, with spherical refractive error less than  $\pm 6.00$  diopters and cylindrical error of less than  $\pm 2.00$  diopters.

## Exclusion

Patients with BCVA vision less than 20/30, cataract greater than Lens Opacification Classification System—Nuclear sclerosis Grade 2/Posterior Subcapsular Cataracts (NS2/PSC) or other significant media opacities, history of ocular conditions such as diabetic or hypertensive retinopathy, macular degeneration, or retinal vascular occlusions or chronic systemic conditions like diabetes or hypertension that can confound retinal oximetry measurements were excluded. Patients regularly taking any systemic drugs or smokers were also excluded.

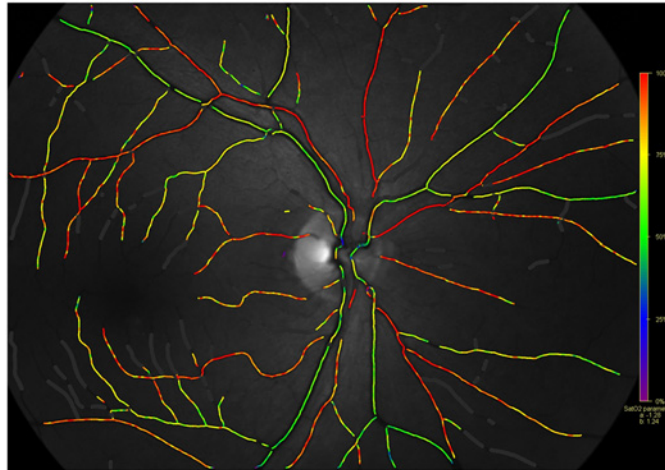

**Fig 1. A normal Oxymap image with the pseudo-colour saturation overlap map (Background image—570 nm).**

doi:10.1371/journal.pone.0126179.g001

## Image Acquisition

All patients underwent dilation with 1% tropicamide and 10% phenylephrine and subsequent retinal imaging with the oximetry using the Oxymap T1 Retinal Oximeter (Oxymap, Reykjavik, Iceland). The procedure was explained to them in detail and a written informed consent was obtained. They were allowed to rest for 5 minutes before the images were captured. This was done to eliminate exercise induced fluctuations in readings. Resting blood pressure and pulse oximetry (H5, Silicon Labs, India) readings were taken for all patients. None of the subjects had consumed caffeine within 2 hours of the examination.

The aiming light was set at the lowest setting, flash intensity was 50W, small aperture and large pupil settings were applied to the TRC 50DX (Topcon, Japan) Fundus camera.

One experienced photographer obtained standardized images for all the subjects. We obtained 2 images per eye in all the subjects—50°—disk centered (Fig 1) and macula centered. Defocus can cause decrease in contrast and hence alterations in the measured values. We ensured that all the images analysed were in sharp focus.

## Segment selection and Analysis

The software used was version 2.4.2. The oxygen saturation was given by the equation: saturation =  $(a \times \text{ODR} + b)100$ ;  $a = -1.28$  and  $b = 1.24$ . Segments of vessels (Fig 2) were then chosen according to the protocol described by Geirsdottir et al[9]. The vessels were at least 8 pixels wide ( $72 \mu\text{m}$ ), at least 100 pixels long, were minimum 50 pixels from the optic disc margin and at least 100 pixels from the edge of the image. In cases of vessel branchings which were less than 150 pixels from the optic disc, segments after the branching were taken. All images had uniform background pigmentation. Arteriolar and venous saturations were determined separately for superior, inferior, nasal and temporal quadrants. For analyzing the quadrant values, we selected the thickest arteriole and venule in each quadrant without any weighted averaging. Global values were also determined by averaging the quadrant values.

## Statistical Analysis

Statistical analysis was done using the IBM SPSS v22 software. All continuous variables were tested for normality using the Shapiro-Wilk test. The difference between means was tested

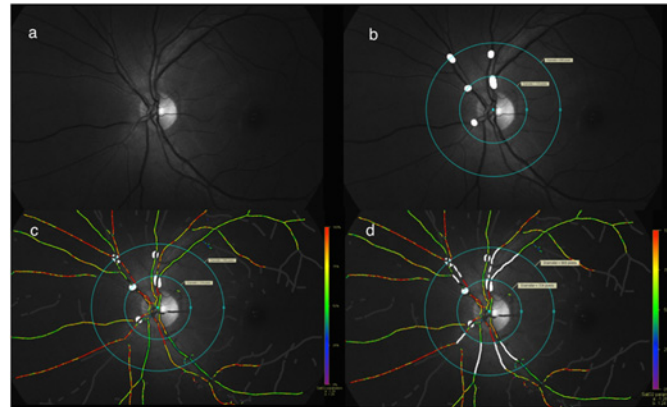

**Fig 2. Method of analyzing images.** a. 570nm image; b. Masking of vessel branchings and A-V crossings along with marking of 2 concentric circles within which vessel segments would be analysed; c. Pseudo-color map along with previous markings; d. Vessel segment markings (thickest arteriole and venule per quadrant)

doi:10.1371/journal.pone.0126179.g002

using independent t-test for normally distributed data and the Mann-Whitney U test for non-parametric data. For normally distributed data the Pearson’s correlation was used, for non parametric data the Spearman’s correlation was used. The level of significance was  $p < 0.05$ . Linear regression was performed after identifying significant correlations.

### Results

There were a total of 98 eyes (98 subjects). The mean age was 33 years (18–63)(SD = 12.4) (Fig 3). There were 44 males and 54 females. No statistically significant bilateral differences were noted and hence only the right eyes were used for the statistical data, hence avoiding duplication. The arteriolar and venous saturations were normally distributed (Shapiro-Wilk Test). The average arteriolar saturation was 90.3 (95% C.I 88.9–91.6) (Standard deviation (SD): 6.57, skewness: 0.086, kurtosis: -0.257) and the venous saturation was 56.9 (95% C.I 55.7–58.2) (SD: 6.31, skewness: -0.004, kurtosis: -0.678). The average A-V (arterio-venous) difference was

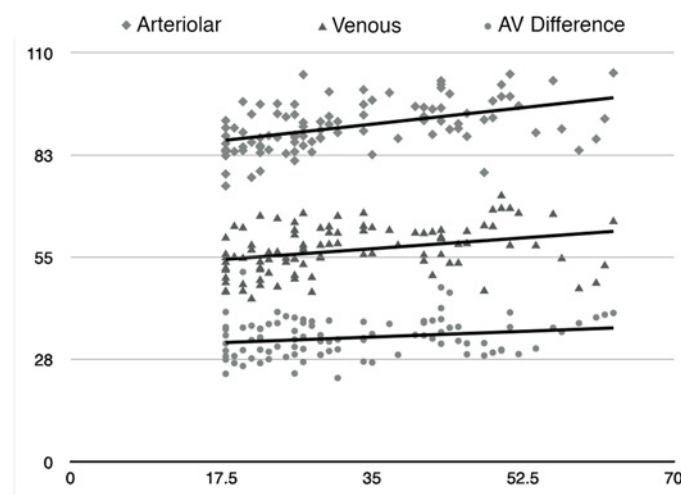

**Fig 3. Relationship of Arteriolar, Venous and A-V Difference Saturations with age.** (x-axis—Age [Years]; y-axis—Saturation [%])

doi:10.1371/journal.pone.0126179.g003

**Table 1. Summary of the Global and Quadrant saturations and diameters.**

|                       | Global       |              |               | Quadrant—Arteriolar |              |              |              | Quadrant—Venous |              |              |              |
|-----------------------|--------------|--------------|---------------|---------------------|--------------|--------------|--------------|-----------------|--------------|--------------|--------------|
|                       | Arteriolar   | Venous       | AV Difference | ST                  | SN           | IN           | IT           | ST              | SN           | IN           | IT           |
| <b>Saturation (%)</b> | 90.3 ± 6.6   | 56.9 ± 6.3   | 33.2 ± 5.2    | 88.0 ± 7.9          | 93.9 ± 8.8   | 93.0 ± 9.2   | 86.2 ± 8.6   | 56.0 ± 6.7      | 60.0 ± 7.6   | 60.2 ± 8.8   | 51.4 ± 6.8   |
| <b>Diameter (µm)</b>  | 123.4 ± 11.2 | 159.7 ± 12.7 |               | 134.3 ± 16.8        | 111.3 ± 16.8 | 111.1 ± 15.6 | 136.4 ± 17.7 | 171.4 ± 21.7    | 142.9 ± 19.8 | 141.7 ± 21.2 | 182.2 ± 20.6 |

AV difference—arterio-venous difference; ST—supero-temporal; SN- supero-nasal; IN—infero-nasal; IT—infero-temporal.

doi:10.1371/journal.pone.0126179.t001

33.2 (95% C.I.—32.2–34.3)) (SD: 5.18, skewness: 0.369, kurtosis: 0.864). The other parameters like diameter and quadrant wise saturation are summarized in [Table 1](#).

### Effect of age

There was an increase in arteriolar ( $R^2 = 0.263$ ,  $p = 0.001$ ) and venous saturation ( $R^2 = 0.151$ ,  $p = 0.001$ ) with age. The A-V difference did not show a significant change with age. The trends have been summarized in [Fig 3](#). The average ocular perfusion pressure (OPP) was 43.6 (95% C. I 42.1–45.1)) (SD: 7.3, skewness: 0.019, kurtosis: -0.526). This showed a positive correlation with age ( $R^2 = 0.073$ ;  $p = 0.007$ ) and with the global arteriolar saturations ( $R^2 = 0.057$ ,  $p = 0.018$ )

### Temporal vs Nasal analysis

The average arteriolar saturation (%) was 87.1 (95% C.I 85.9–88.3) temporally and 93.5 (95% C.I 92.2–94.8) nasally ( $p = 0.001$ ); whereas the venous saturation was 53.7 (95% C.I 52.7–54.7) temporally and 60.1 (95% C.I 59.0–61.3) nasally ( $p = 0.001$ ). The average arterial and venous diameters (µm) were 135 and 177 temporally; whereas they were 111 and 142 nasally ( $p = 0.001$ ,  $p = 0.001$ ). Both the temporal ( $R^2 = 0.04$ ,  $p = 0.007$ ) and nasal ( $R^2 = 0.03$ ,  $p = 0.026$ ) saturations correlated positively with the OPP. The inferotemporal quadrant had the lowest saturations with 86% and 51%, highest diameters with 136µm and 182µm, arteriolar and venous respectively.

### Eye Laterality

There were no statistically significant bilateral differences noted in either the quadrants or the global arteriolar, venous or A-V difference saturations.

### Multivariate regression

A multiple linear regression was performed for the dependent variables namely the arteriolar, venous and A-V difference saturations by taking the independent variables as age, sex, ocular perfusion pressure and spherical equivalent. The results have been summarized in [Table 2](#). The naïve analysis of all the variables in the table yielded a significant correlation; age was the only significant variable in the multivariate model for global arteriolar and venous values.

### Effect of diameter

We found a negative correlation between diameter and saturation for individual vascular segments (arterioles:  $R^2 = 0.06$ ,  $p = 0.001$ ; venules:  $R^2 = 0.05$ ,  $p = 0.001$ ). Globally average diameter and saturation showed a weak negative correlation which was not statistically significant.

**Table 2. Multivariate analysis for arteriolar, venous and A-V difference saturations (only those parameters significant on univariate analysis were included in the multivariate analysis).**

| Variable     | Arteriolar                |         | Venous                    |         | A-V Difference            |         |
|--------------|---------------------------|---------|---------------------------|---------|---------------------------|---------|
|              | Standardised Co-efficient | P Value | Standardised Co-efficient | P Value | Standardised Co-efficient | P Value |
| Intercept    | 76.64                     | <0.001  | 50.90                     | <0.001  | 33.66                     | <0.001  |
| Age          | 0.41                      | <0.001  | 0.263                     | 0.028   | -0.077                    | 0.542   |
| Spherical Eq | 0.066                     | 0.507   | 0.064                     | 0.548   | -0.007                    | 0.950   |
| Systolic     | 0.039                     | 0.810   | 0.088                     | 0.614   | -0.077                    | 0.678   |
| Diastolic    | 0.048                     | 0.821   | -0.232                    | 0.314   | 0.017                     | 0.944   |
| OPP          | 0.053                     | 0.832   | 0.220                     | 0.412   | 0.108                     | 0.706   |

doi:10.1371/journal.pone.0126179.t002

## Discussion

Our results on normative Asian Indian eyes using the Oxymap T1 retinal oximeter yields an average saturation of 90.3% in the arterioles and 56.9% in the venules which is similar to previous studies [8,9] which give an average arteriolar value of 90.4–92.2% and a venous value of 55.3–55.6%.

### Pulse Oximetry and the eye

The difference between the average pulse oximetry readings and the average arterial SO<sub>2</sub> is 7%, but no statistical correlation was found between the two parameters. The standard deviation of the pulse oximetry readings is only 2 as compared to 7 with oximetry.

### Perfusion pressure

Geirsdottir et al have in their study showed the ocular perfusion pressure increases with age.[9] We found a similar trend in our study as well. This would cause the blood to course faster through the retinal vasculature.

### Effect of aging

Tissue loss with aging[10] should result in lower oxygen extraction and hence higher saturations. There is also a decrease in diameter with age. This too can result in optical artifacts, artificially raising the saturations. Aging can also result in subtle changes in the lens resulting in decreased contrast in the acquired images. This can cause a lower measured saturation.[11] We found an increase in arteriolar, and venous saturations with age, leaving the A-V difference unaffected. We feel that decreased diameter, decreased retinal nerve fiber layer thickness and increased perfusion pressure would lead to this trend. We attribute the increased saturation in arterioles and venules found in our study to multiple factors. An opposite trend was noted in the previously mentioned studies. Retinal tissue is lost with aging, hence there are 2 important events that occur. The first being that the oxygen requirement and extraction decreases hence increasing saturation. In the setting of decreased tissue A-V difference should decrease. But here we are looking at oxygen extraction which is a product of A-V difference x blood flow. Blood flow is heavily dependent on diameter which decreases with age, as a result of age related arteriolosclerosis. This means the total amount of blood flowing through the human retina decreases as age advances. Hence a decrease in extraction with an associated decrease in blood flow may explain the unaffected A-V difference with age. The second important event

occurring with advancing age is a theoretical decrease in the reflectivity due to loss of RNFL. This might not manifest significantly in Caucasians, but in more heavily pigmented fundi like in Indians, more melanin is exposed, hence absorbing more light. This could alter the final measured Optical Density Ratio (ODR), hence altering saturation measurements. These are hypotheses that need to be tested. There is also a possibility that the Retinal Nerve Fiber Layer (RNFL) responds differently at 570nm and at 600nm. Jani et al state that fundus pigmentation did not affect measurements, but maybe all those subjects had a good RNFL thickness not allowing the complete role of melanin to manifest.

The vessel walls change with age owing to sclerosis, which may alter the amount of light that interacts with the blood column and thus prevents us from measuring the true saturation. Our patients were methodically screened and we ensured that none of them had systemic hypertension or diabetes. It would be interesting to see how saturations vary with varying grades of hypertensive retinopathy. On one hand increased perfusion pressure and blood flow velocity may alter saturation, and altered vessel wall characteristics may change saturation on the other.

## Conclusion

This study provides the normative database for an Indian population and is comparable to previous studies. Age was the most significant factor that influenced the saturation. We also see that diameter and saturation of individual vessel segments are inversely correlated. Arteriolar and venous saturations increased with age whereas A-V difference saturations remained unchanged in this study. It is essential to understand the normal variations in the saturation to be able to pick up subtle changes in pathology.

## Author Contributions

Conceived and designed the experiments: AM SD NKY. Performed the experiments: AM. Analyzed the data: AM SD RSK MK. Contributed reagents/materials/analysis tools: RS. Wrote the paper: AM SD NKY RSK RS.

## References

1. Kur J, Newman EA, Chan-Ling T. Cellular and physiological mechanisms underlying blood flow regulation in the retina and choroid in health and disease. *Progress in Retinal and Eye Research* 2012; 31: 377–406. doi: [10.1016/j.preteyeres.2012.04.004](https://doi.org/10.1016/j.preteyeres.2012.04.004) PMID: [22580107](https://pubmed.ncbi.nlm.nih.gov/22580107/)
2. Vandewalle E, Abegão Pinto L, Olafsdottir OB, De Clerck E, Stalmans P, Calster J, et al. Oximetry in glaucoma: correlation of metabolic change with structural and functional damage. *Acta Ophthalmologica* 2014; 92: 105–110. doi: [10.1111/aos.12011](https://doi.org/10.1111/aos.12011) PMID: [23323611](https://pubmed.ncbi.nlm.nih.gov/23323611/)
3. Hardarson SH, Stefánsson E. Oxygen saturation in branch retinal vein occlusion. *Acta Ophthalmologica* 2011; 90: 466–470. doi: [10.1111/j.1755-3768.2011.02109.x](https://doi.org/10.1111/j.1755-3768.2011.02109.x) PMID: [21518303](https://pubmed.ncbi.nlm.nih.gov/21518303/)
4. Geirsdóttir A, Hardarson SH, Olafsdóttir OB, Stefánsson E. Retinal oxygen metabolism in exudative age-related macular degeneration. *Acta Ophthalmologica* 2013; 92: 27–33. doi: [10.1111/aos.12294](https://doi.org/10.1111/aos.12294) PMID: [24447786](https://pubmed.ncbi.nlm.nih.gov/24447786/)
5. Hammer M, Heller T, Jentsch S, Dawczynski J, Schweitzer D, Peters S, et al. Retinal Vessel Oxygen Saturation under Flicker Light Stimulation in Patients with Nonproliferative Diabetic Retinopathy. *Invest Ophthalmol Vis Sci* 2012; 53: 4063–4068. doi: [10.1167/iovs.12-9659](https://doi.org/10.1167/iovs.12-9659) PMID: [22589440](https://pubmed.ncbi.nlm.nih.gov/22589440/)
6. Hardarson SH, Harris A, Karlsson RA, Halldorsson GH, Kagemann L, Rechtman E, et al. Automatic Retinal Oximetry. *Invest Ophthalmol Vis Sci* 2006; 47: 5011–5016. PMID: [17065521](https://pubmed.ncbi.nlm.nih.gov/17065521/)
7. Hammer M, Thamm E, Schweitzer D. A simple algorithm for in vivo ocular fundus oximetry compensating for non-haemoglobin absorption and scattering. *Phys Med Biol* 2002; 47: N233–N238. PMID: [12361226](https://pubmed.ncbi.nlm.nih.gov/12361226/)
8. Jani PD, Mwanza J-C, Billow KB, Waters AM, Moyer S, Garg S. Normative values and predictors of retinal oxygen saturation. *Retina* 2014; 34: 394–401. doi: [10.1097/IAE.0b013e3182979e7b](https://doi.org/10.1097/IAE.0b013e3182979e7b) PMID: [23842102](https://pubmed.ncbi.nlm.nih.gov/23842102/)

9. Geirsdottir A, Palsson O, Hardarson SH, Olafsdottir OB, Kristjansdottir JV, Stefansson E. Retinal Vessel Oxygen Saturation in Healthy Individuals. *Invest Ophthalmol Vis Sci* 2012; 53: 5433–5442. doi: [10.1167/iovs.12-9912](https://doi.org/10.1167/iovs.12-9912) PMID: [22786895](https://pubmed.ncbi.nlm.nih.gov/22786895/)
10. Bonnel S, Mohand-Said S, Sahel J-A. The aging of the retina. *Experimental Gerontology* 2003; 38: 825–831. PMID: [12915204](https://pubmed.ncbi.nlm.nih.gov/12915204/)
11. Hardarson SH. Retinal oximetry. *Acta Ophthalmologica* 2013; 91: 489–490. doi: [10.1111/aos.12239](https://doi.org/10.1111/aos.12239) PMID: [23844858](https://pubmed.ncbi.nlm.nih.gov/23844858/)
